# Supplementary material
Source: publisher site journal article supplement (https://www.dovepress.com/article/554665)
Supplement: Supplementary file 1 [file 554665_Supplementary%20Materials%20revised_1.docx]

**Comparative Effectiveness of Pharmacological, Non-pharmacological, and Combined Strategies for Pain Relief During Colonoscopy: A Bayesian Network Meta-analysis of Randomized Trials**

**Supplementary Materials**

**Table 1s Search strategy**

| **Patients：**  Colonoscopy  Colonoscopic Surgery | **Comparison：**  Placebo  Blank control  Air insufflation |
| --- | --- |
| **Interventions：**  Anisodamine hydrobromide  6-hydroxyhyoscyamine  Midazolam  Fentanyl  Propofol  Ketorolac trometamol  Meperidine  L-menthol  Peppermint oil  Simethicone  Lidocaine  Water exchange  Water aided  Carbon dioxide  Nitrous oxide  Transcutaneous electrical acupoint stimulation  Transcutaneous electric nerve stimulation  Abdominal compression  Abdominal corset  Acupuncture  Virtual reality  Audiovisual distraction  Visual distraction  Smartphone  hot pack | **Outcomes：**  Pain score  Visual analog scale  Numerical rating scale  Anxiety  Patient satisfaction  Pain measurement  Sedative drug dosage |
| **Study：**  Randomized controlled trial  Controlled clinical trial |
| **Time：**  2004/11/7 – 2024/11/7 |

**Table 2s WOS search formula**

|  | Search Query | Database | Results |
| --- | --- | --- | --- |
| 1 | (((((SO=(randomized controlled trial)) OR SO=(controlled clinical trial)) OR TS=(random*)) OR TS=(placebo)) OR TS=(trial)) OR TS=(group) and Preprint Citation Index (Exclude – Database) | All Databases | 18375836 |
| 2 | (((TS=(colonoscopy)) OR TS=(colonoscop*)) OR TS=(colonoscopic surgical procedure)) OR TS=(colonoscopic surgery) and Preprint Citation Index (Exclude – Database) | All Databases | 91301 |
| 3 | ((((((((((((((((((((((((((((((((((((((((((TS=(water exchange)) OR TS=(water aided)) OR TS=(water assisted)) OR TS=(water infusion)) OR TS=(carbon dioxide)) OR TS=(CO2)) OR TS=(anisodamine hydrobromide)) OR TS=(raceanisodamine)) OR TS=(6-hydroxyhyoscyamine)) OR TS=(lidocaine)) OR TS=(transcutaneous electric nerve stimulation)) OR TS=(stiumlation)) OR TS=(TEAS)) OR TS=(TENS)) OR TS=(transcutaneous electrical acupoint stimulation)) OR TS=(Electric*)) OR TS=(nitrous oxide)) OR TS=(midazolam)) OR TS=(fentan*)) OR TS=(propofol)) OR TS=(ketorolac trometamol)) OR TS=(meperidine)) OR TS=(L-Menthol)) OR TS=(Colpermin)) OR TS=(peppermint oil)) OR TS=(alverine citrate)) OR TS=(simethicone)) OR TS=(patient controlled analgesia)) OR TS=(patient controlled)) OR TS=(PCA)) OR TS=(abdominal compression)) OR TS=(abdominal massage)) OR TS=(Acupuncture)) OR TS=(Electroacupuncture)) OR TS=(virtual reality)) OR TS=(VR)) OR TS=(music)) OR TS=(audiovisual distraction)) OR TS=(visual distraction)) OR TS=(smartphone)) OR TS=(hot pack)) OR TS=(progressive muscle relaxation)) OR TS=(abdominal corset) and Preprint Citation Index (Exclude – Database) | All Databases | 20139297 |
| 4 | (((((TS=(visual analog scale)) OR TS=(Time)) OR TS=(anxiety)) OR TS=(patient satisfaction)) OR TS=(pain management)) OR TS=(pain measurement) and Preprint Citation Index (Exclude – Database) | All Databases | 29916318 |
| 5 | DOP=(2004-11-07/2024-11-07) and Preprint Citation Index (Exclude – Database) | All Databases | 118366802 |
| 6 | #5 AND #4 AND #3 AND #2 AND #1 and Preprint Citation Index (Exclude – Database) | All Databases | 3507 |

**Table 3s EMBASE search formula**

| No. | Query | Results |
| --- | --- | --- |
| #6 | #1 AND #2 AND #3 AND #4 AND #5 | 1273 |
| #5 | [2004-2024]/py | 28521893 |
| #4 | 'randomized controlled trial':it OR 'controlled clinical trial'/de OR 'randomized controlled trial'/de OR randomized:ti,ab OR placebo:ti,ab OR randomly:ti,ab OR trial:ti,ab OR group:ti,ab | 6525229 |
| #3 | 'visual analog scale'/de OR 'visual analogue scale' OR time OR anxiety OR 'patient satisfaction'/de OR 'patient satisfaction' OR 'pain management'/de OR 'pain management' OR 'pain measurement'/de OR 'pain measurement' | 7533428 |
| #2 | 'water exchange':ti,ab OR 'water aided':ti,ab OR 'water assisted':ti,ab OR 'water infusion':ti,ab OR 'carbon dioxide'/exp OR 'carbon dioxide':ti,ab OR 'anisodamine hydrobromide':ti,ab OR raceanisodamine:ti,ab OR '6-hydroxyhyoscyamine':ti,ab OR lidocaine:ti,ab OR 'transcutaneous electric nerve stimulation'/exp OR 'transcutaneous electric nerve stimulation':ti,ab OR 'electricity'/de OR electric*:ti,ab OR stimulation:ti,ab OR 'transcutaneous electrical acupoint stimulation':ti,ab OR teas:ti,ab OR tens:ti,ab OR 'nitrous oxide':ti,ab OR midazolam:ti,ab OR fentan*:ti,ab OR propofol:ti,ab OR 'ketorolac trometamol':ti,ab OR meperidine:ti,ab OR 'l-menthol':ti,ab OR colpermin:ti,ab OR 'peppermint oil':ti,ab OR 'alverine citrate':ti,ab OR simethicone:ti,ab OR 'patient controlled analgesia':ti,ab OR pca:ti,ab OR 'abdominal compression':ti,ab OR 'abdominal massage':ti,ab OR 'acupuncture'/de OR acupuncture:ti,ab OR electroacupuncture:ti,ab OR 'virtual reality'/de OR 'virtual reality':ti,ab OR vr:ti,ab OR music:ti,ab OR 'audiovisual distraction':ti,ab OR 'visual distraction':ti,ab OR smartphone:ti,ab OR 'hot pack':ti,ab OR 'progressive muscle relaxation':ti,ab OR 'abdominal corset':ti,ab | 1731533 |
| #1 | 'colonoscopy'/exp OR 'colonoscop*':ti,ab OR 'colonoscopic surgical procedure':ti,ab OR 'colonoscopic surgery':ti,ab | 123628 |

**Table 4s PUBMED search formula**

|  | Query | Results |
| --- | --- | --- |
| 10 | ((((#1) AND (#2)) AND (#7)) AND (#8)) AND (#9) | 518 |
| 9 | ("2004/11/07"[Date - Create] : "2024/11/07"[Date - Create]) | 22,386,994 |
| 8 | (((((((((Visual Analogue Scale[MeSH Major Topic]) OR (Visual Analogue Scale[Text Word])) OR (Time[Text Word])) OR (anxiety[Text Word])) OR (Patient Satisfaction[Text Word])) OR (Patient Satisfaction[MeSH Major Topic])) OR (Pain Management[MeSH Major Topic])) OR (Pain Management[Text Word])) OR (Pain Measurement[Text Word])) OR (Pain Measurement[MeSH Major Topic]) | 5,661,183 |
| 7 | (((#3) OR (#4)) OR (#5)) OR (#6) | 504,759 |
| 6 | ((((((((((((((Abdominal compression[Title/Abstract]) OR (Abdominal massage[Title/Abstract])) OR (Acupuncture[Title/Abstract])) OR (Electroacupuncture[Title/Abstract])) OR (Acupuncture[MeSH Major Topic])) OR (Virtual Reality[MeSH Major Topic])) OR (Virtual Reality[Title/Abstract])) OR (VR[Title/Abstract])) OR (music[Title/Abstract])) OR (audiovisual distraction[Title/Abstract])) OR (Visual distraction[Title/Abstract])) OR (smartphone[Title/Abstract])) OR (Hot Pack[Title/Abstract])) OR (Progressive Muscle Relaxation[Title/Abstract])) OR (Abdominal Corset[Title/Abstract]) | 117,434 |
| 5 | (((((((((((((Nitrous oxide[Title/Abstract]) OR (midazolam[Title/Abstract])) OR (fentan*[Title/Abstract])) OR (propofol[Title/Abstract])) OR (ketorolac trometamol[Title/Abstract])) OR (meperidine[Title/Abstract])) OR (L-Menthol[Title/Abstract])) OR (Colpermin[Title/Abstract])) OR (peppermint oil[Title/Abstract])) OR (alverine citrate[Title/Abstract])) OR (simethicone[Title/Abstract])) OR (patient-controlled analgesia[Title/Abstract])) OR (Analgesia, Patient-Controlled[MeSH Major Topic])) OR (PCA[Title/Abstract]) | 144,973 |
| 4 | (((((Transcutaneous Electric Nerve Stimulation[MeSH Major Topic]) OR (Transcutaneous Electric Nerve Stimulation[Title/Abstract])) OR (Electric stiumlation[Title/Abstract])) OR (Transcutaneous electrical acupoint stimulation[Title/Abstract])) OR (TEAS[Title/Abstract])) OR (TENS[Title/Abstract]) | 32,556 |
| 3 | (((((((((water exchange[Title/Abstract]) OR (water aided[Title/Abstract])) OR (water assisted[Title/Abstract])) OR (water infusion[Title/Abstract])) OR (Carbon dioxide[Title/Abstract])) OR (CO2[Title/Abstract])) OR (anisodamine hydrobromide[Title/Abstract])) OR (raceanisodamine[Title/Abstract])) OR (6-hydroxyhyoscyamine[Title/Abstract])) OR (lidocaine[Title/Abstract]) | 222,996 |
| 2 | (((Colonoscopy[MeSH Major Topic]) OR (Colonoscop*[Title/Abstract])) OR (Colonoscopic Surgical Procedure[Title/Abstract])) OR (Colonoscopic Surgery[Title/Abstract]) | 45,048 |
| 1 | ((((((randomized controlled trial[Publication Type]) OR (controlled clinical trial[Publication Type])) OR (randomized[Title/Abstract])) OR (placebo[Title/Abstract])) OR (randomly[Title/Abstract])) OR (trial[Title/Abstract])) OR (groups[Title/Abstract]) | 4,050,834 |

**Table 5s Comprehensive table of each study**

| **First Author, Year** | **Population** | **Group** | **Sample Size** | **Intervention** | **Dosage/Parameters** | **Pain Score Mean (SD)** |
| --- | --- | --- | --- | --- | --- | --- |
| Ni Yufei, 20081 | Adults | 1 | 40 | Electroacupuncture | Acupoints: GB34, ST36, ST37, SP6 | 2.25（0.9） |
| 2 | 40 | Blank Control | - | 2.51（0.81） |
| James, 20082 | Adults | 1 | 46 | CO₂, Diazepam, Pethidine | 0.1 mg/kg; 0.5 mg/kg | 2.34（0.42） |
| 2 | 50 | Diazepam, Pethidine | 0.1 mg/kg; 0.5 mg/kg | 4.16（0.4） |
| Leung, 20093 | - | 1 | 28 | Water perfusion, Fentanyl, Midazolam | Intermittent infusion of water using peristaltic pump; 25 mg; 1 mg | 1.3（1.8） |
| 2 | 28 | Fentanyl, Midazolam | 25mg; 1mg | 4.1（3.4） |
| Hayee, 20094 | Adults | 1 | 149 | Meperidine, Midazolam | 50mg; 0.05mg/kg | 1.5（0.16） |
| 2 | 138 | Fentanyl, Midazolam | 25-100 mg; 0.05mg/kg | 1.7（0.19） |
| Hsieh, 20095 | Adults | 1 | 100 | Meperidine, Propofol | 25mg; 1mg/kg | 0.97（1.48） |
| 2 | 100 | Propofol | 1mg/kg | 1.38（1.76） |
| Felix, 20106 | - | 1 | 42 | Water Infusion | If there is residual feces, add water and suction until visibility is restored. | 3.6（2.1） |
| 2 | 40 | Blank Control | - | 5.5（3） |
| Radaelli, 20107 | Adults aged 18-80 | 1 | 116 | Water Infusion | The peristaltic flushing pump intermittently injects 37° warm water, and the flow rate is set to 210 mL/min | 2.8（2.4） |
| 2 | 114 | Blank Control | - | 3.55（3） |
| Geyer, 20118 | - | 1 | 110 | CO2, Propofol | Basic flow rate 0.5 L/min, increased to 3 L/min if necessary; 10-20 mg | 1.2（1.9） |
| 2 | 109 | Propofol | 10-20mg | 1.2（1.8） |
| Amer-Cuenca, 20119 | Adults | 1 | 30 | Electrical stimulation | 7*13cm electrodes on both sides of L1-S3, frequency: 80-100HZ, intensity value is the patient's maximum tolerance | 2.46（5.73） |
| 2 | 30 | Placebo electrical stimulation | No current | 5.73（2.79） |
| 3 | 30 | Blank Control | - | 4.91（3.16） |
| POHL, 201110 | Adults | 1 | 58 | Water Infusion | Warm water infusion to dilate the colon and shut off the air supply | 2.5（1.7） |
| 2 | 58 | Blank Control | Air | 4.3（2.3） |
| Hsieh, 201111 | - | 1 | 90 | Water infusion, Meperidine, Scopolamine | 25 mg and 20mg before surgery | 2.5（2.5） |
| 2 | 89 | Meperidine, Scopolamine | 25 mg and 20mg before surgery | 3.4（2.8） |
| Toros, 201212 | - | 1 | 106 | Abdominal compression | Abdominal compression | 3.89（2.66） |
| 2 | 110 | Blank Control | - | 5.74（2.77） |
| Chen, 201213 | Adults aged 65 and above | 1 | 23 | CO2 | - | 4.05（1.67） |
| 2 | 24 | Blank Control | Air | 7.02（13.7） |
| 3 | 26 | CO2, Dezocine, Diazepam | 5 mg and 2.5 mg injected into the gluteus maximus | 3.07（1.02） |
| 4 | 25 | Dezocine, Diazepam | 5 mg and 2.5 mg injected into the gluteus maximus | 5.04（0.87） |
| Bayupurnama, 201214 | Adults | 1 | 53 | Water Infusion | Water immersion and water exchange, turn off the air pump | 4.1（2.6） |
| 2 | 57 | Blank Control | - | 6.4（2.4） |
| Szura, 201515 | Adults aged 50-65 | 1 | 100 | CO2 | - | 2.4（1.3） |
| 2 | 100 | Blank Control | Air | 2.44（1.2） |
| Umezawa, 201516 | Adults aged 20-80 | 1 | 28 | Visual distraction | Wearable display to watch silent movies | 3.03（2.39） |
| 2 | 29 | Blank Control | Wear the display without playing any content | 5.15（2.47） |
| Chen, 201517 | Adults aged 18-65 | 1 | 114 | Electrical stimulation, Dentanyl, Propofol | Jiaji points on both sides, 30 minutes, 2-100HZ sparse and dense waves, current intensity until muscle twitching; intravenous injection of 0.05 μg/kg; as needed | 2.35（0.75） |
| 2 | 115 | Placebo electrical stimulation, Fentanyl, Propofol | Same as above but without current output; 0.05 μg/kg IV; as needed | 3.35（2.25） |
| Jiang, 201518 | Adults | 1 | 60 | Visual distraction | Silent playback of DVDs of interest | 4.89 (2.8) |
| 2 | 60 | Visual and auditory distraction | DVD with audio playback that you are interested in | 4.51 (2.26) |
| 3 | 60 | Blank Control | - | 5.16 (2.9) |
| Schroeder, 201619 | Adults | 1 | 126 | Propofol | As needed, not exceeding 60 mg | 0.2（0.9） |
| 2 | 136 | Fentanyl, Midazolam | 2mg；50μg | 2.4（3.1） |
| Silva, 201620 | - | 1 | 66 | Music, Meperidine, Midazolam | Patient-selected music; 5 mg divided into equal parts, increased as needed; 0.5 mg divided into equal parts, increased as needed | 3（1.52） |
| 2 | 67 | Visual distraction, Meperidine, Midazolam | Patient choice of film; 5 mg divided into equal parts, increased as needed; 0.5 mg divided into equal parts, increased as needed | 4（3.03） |
| 3 | 67 | Meperidine, Midazolam | 5 mg divided into equal parts, increase as needed; 0.5 mg divided into equal parts, increase as needed | 5.35（3.79） |
| Ko, 201621 | - | 1 | 40 | Music, Fentanyl, Midazolam | Wear MP3 and listen to 15 light music; the smallest standard dose | 3.24（2.72） |
| 2 | 40 | Fentanyl, Midazolam | Minimum standard dose | 3.37（3.07） |
| Cao, 201722 | Adults aged 65-75 | 1 | 20 | Water infusion | The water pump injects 36°C warm water instead of air to expand the intestinal tube | 3.1（1.4） |
| 2 | 20 | Blank Control | Air | 4.9（1.7） |
| Azevedo, 201823 | Adults aged 18-90 | 1 | 70 | Water infusion | Water exchange to remove occlusion and air bubbles | 3.39（2.32） |
| 2 | 71 | Blank Control | Air | 4.94（2.1） |
| Adigun, 201924 | Adults | 1 | 31 | Pentazocine, Midazolam | 2.5 mg; 15 mg | 4.8（1.9） |
| 2 | 31 | Fentanyl, Propofol | 0.5 mg/kg; 0.5ug/kg | 3.19（1.9） |
| Pontone, 202025 | Adults | 1 | 40 | Fentanyl, Midazolam | 50 μg; 0.07mg/kg | 3.95（2.77） |
| 2 | 40 | Meperidine, Midazolam | 50 mg; 0.07mg/kg | 1.87（2.23） |
| Veldhuijzen, 202026 | - | 1 | 10 | Visual distraction, Alfentanil, Midazolam | VR plays Caribbean movies, but no sound; injection on demand | 3.27（3.44） |
| 2 | 9 | Alfentanil, Midazolam | Injection on demand | 2.63（2.62） |
| Hsieh, 202027 | Adults aged 40-80 | 1 | 75 | Water infusion | Turn off the air pump and inject warm tap water to suck out the air. | 2.1（2.6） |
| 2 | 75 | Blank Control | Air | 4（2.9） |
| Joan, 202128 | Adults | 1 | 19 | Electrical stimulation | A 2.5*2.5cm electrode is placed on Zusanli, with a frequency of 4HZ and an intensity of painless muscle twitching. | 4.6（4.6） |
| 2 | 18 | Placebo electrical stimulation | Wear but don't activate | 6（2.58） |
| Cakir, 202129 | Adults | 1 | 30 | VR | - | 2.76（1.25） |
| 2 | 30 | Blank Control | Air | 3.76（2.11） |
| Han, 202130 | Patients aged 16-60 years | 1 | 180 | Visual distraction | Playing with mobile phone | 2.18（2.8） |
| 2 | 180 | Blank Control | Air | 3.55（3.07） |
| Brix, 202231 | Adults undergoing first-time screening | 1 | 169 | Music, Fentanyl, Midazolam | Instruments and natural sounds; 0.25mcg; 3mg | 4.7（4.49） |
| 2 | 168 | Fentanyl, Midazolam | 0.25mcg; 3mg | 4（2.99） |
| Liu, 202232 | - | 1 | 58 | VR | Short film featuring tropical islands and forests, accompanied by soothing music, 30 minutes | 5（1.52） |
| 2 | 59 | Blank Control | Wearing VR and headset without any video or sound | 7（1.52） |
| Sun, 202233 | - | 1 | 112 | Music | 15 popular piano songs with soft melodies, moderate rhythms and no lyrics | 1.37（1.78） |
| 2 | 104 | Blank Control | Air | 2.06（2.04） |
| Tani, 202234 | Adults aged 18-80 | 1 | 42 | Music | Binaural Beats | 5.19（2.68） |
| 2 | 48 | Blank Control | Air | 6.65（2.5） |
| He, 202235 | Adults aged 18-79 | 1 | 91 | Acupuncture, Propofol | Wrist-ankle acupuncture: 0.5 mg/kg | 1.38（0.49） |
| 2 | 90 | Propofol | 0.5mg/kg | 2.31（0.47） |
| Cakir, 202336 | Adults | 1 | 30 | Music | Wear it for the first ten minutes, classical Turkish music | 2.76（1.5） |
| 2 | 30 | Abdominal compression | Press ball | 4.36（1.56） |
| 3 | 30 | VR | Watch licensed VR app 'A Walk on the Beach' with sound | 3.2（1.06） |
| 4 | 30 | Blank Control | Air | 4.1（1.95） |
| Huang, 202437 | Adults aged 18-75 | 1 | 60 | Electrical stimulation | 2.5cm diameter electrode on ankle, 2HZ, current to maximum tolerance | 3.82（2.66） |
| 2 | 60 | Placebo electrical stimulation | Minimum current | 5.32（1.44） |
| Shamali, 202438 | - | 1 | 23 | VR, Fentanyl, Midazolam | Patients choose according to their needs | 2.26（2.8） |
| 2 | 24 | Fentanyl, Midazolam | Injection on demand | 3.96（2.8） |
| Hirani, 202439 | Adults | 1 | 55 | Music, Nalbuphine, Midazolam | Unique recordings of nature (such as the rhythmic sounds of birds, ocean waves, forests, rainfall, etc.), combined with soft instruments; 0.1-0.2mg/kg; maximum 5mg | 2.92（1.5） |
| 2 | 55 | Nalbuphine, Midazolam | 0.1-0.2 mg/kg; maximum 5 mg | 3.15（1.3） |
| Veisman, 202440 | Adults | 1 | 30 | VR | Relaxation video clips | 4.36（0.78） |
| 2 | 30 | Blank Control | Air | 2.64（0.78） |

**Table 6s Specific categories of all interventions**

| 1 | Blank Control | |
| --- | --- | --- |
| 2 | Placebo | |
| 3 | Propofol | |
| 4 | Water perfusion/CO2 insufflation | Water perfusion |
| CO2 insufflation |
| 5 | Distraction | Virtual reality |
| Music |
| Visual distraction |
| 6 | External physical intervention | Electrical stimulation |
| Abdominal compression |
| 7 | Distraction + Analgesia + Sedation | Visual distraction + Fentanyl + Midazolam |
| Music + Fentanyl + Midazolam |
| Virtual reality + Fentanyl + Midazolam |
| Music + Nalbuphine + Midazolam |
| Music + Pethidine + Midazolam |
| Virtual reality + Pethidine + Midazolam |
| 8 | CO2/Water insufflation + Analgesia + Sedation | CO2 + Diazepam + Pethidine |
| Water perfusion + Fentanyl + Midazolam |
| Water perfusion + Pethidine |
| CO2 + Dezocine + Diazepam |
| 9 | Pethidine + Sedation | Pethidine |
| Pethidine + Midazolam |
| Pethidine + Propofol |
| 10 | Fentanyl + Sedation | Fentanyl + Midazolam |
| Fentanyl + Propofol |
| 11 | Physical intervention + Analgesia + Sedation | Electrical stimulation + Fentanyl + Propofol |
| Acupuncture + Propofol |
| 12 | Agonist-antagonist opioids + Sedation | Dezocine + Diazepam |
| Diazepam + Meperidine |
| Nalbuphine + Midazolam |
| Pentazocine + Midazolam |


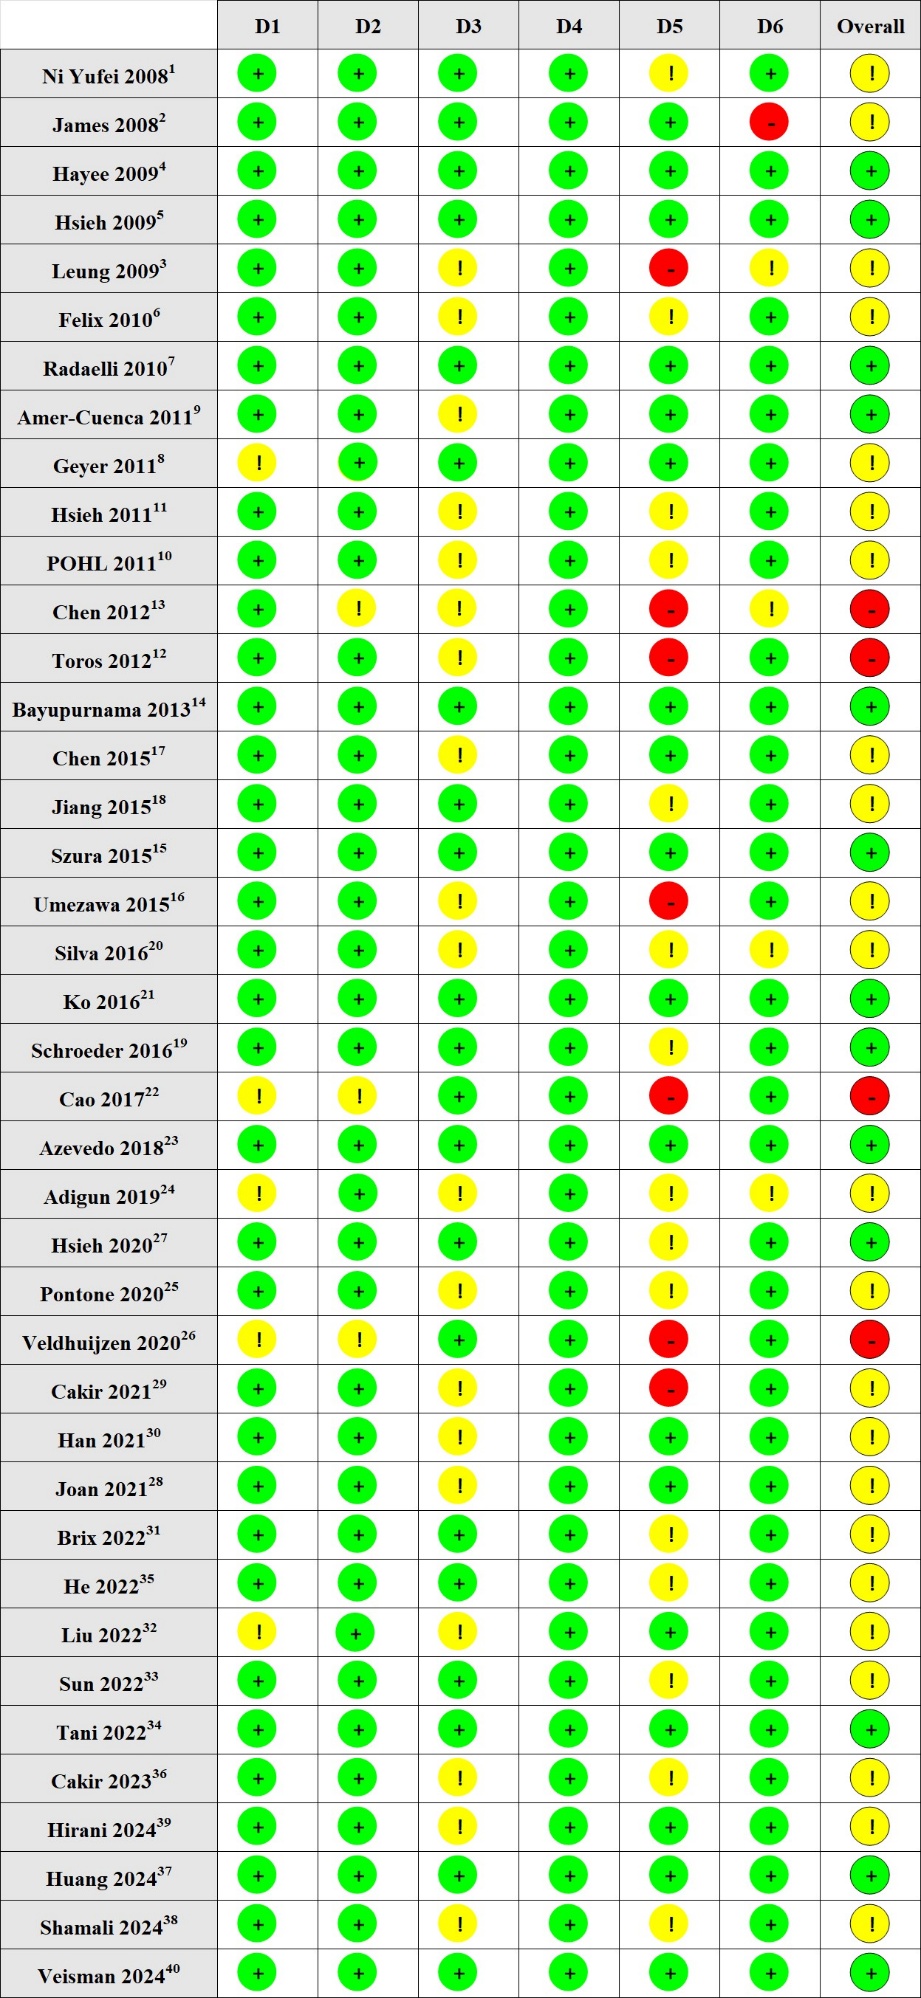


**Figure 1s Risk of Bias 2 assessment for each item and included study network meta-analysis.**
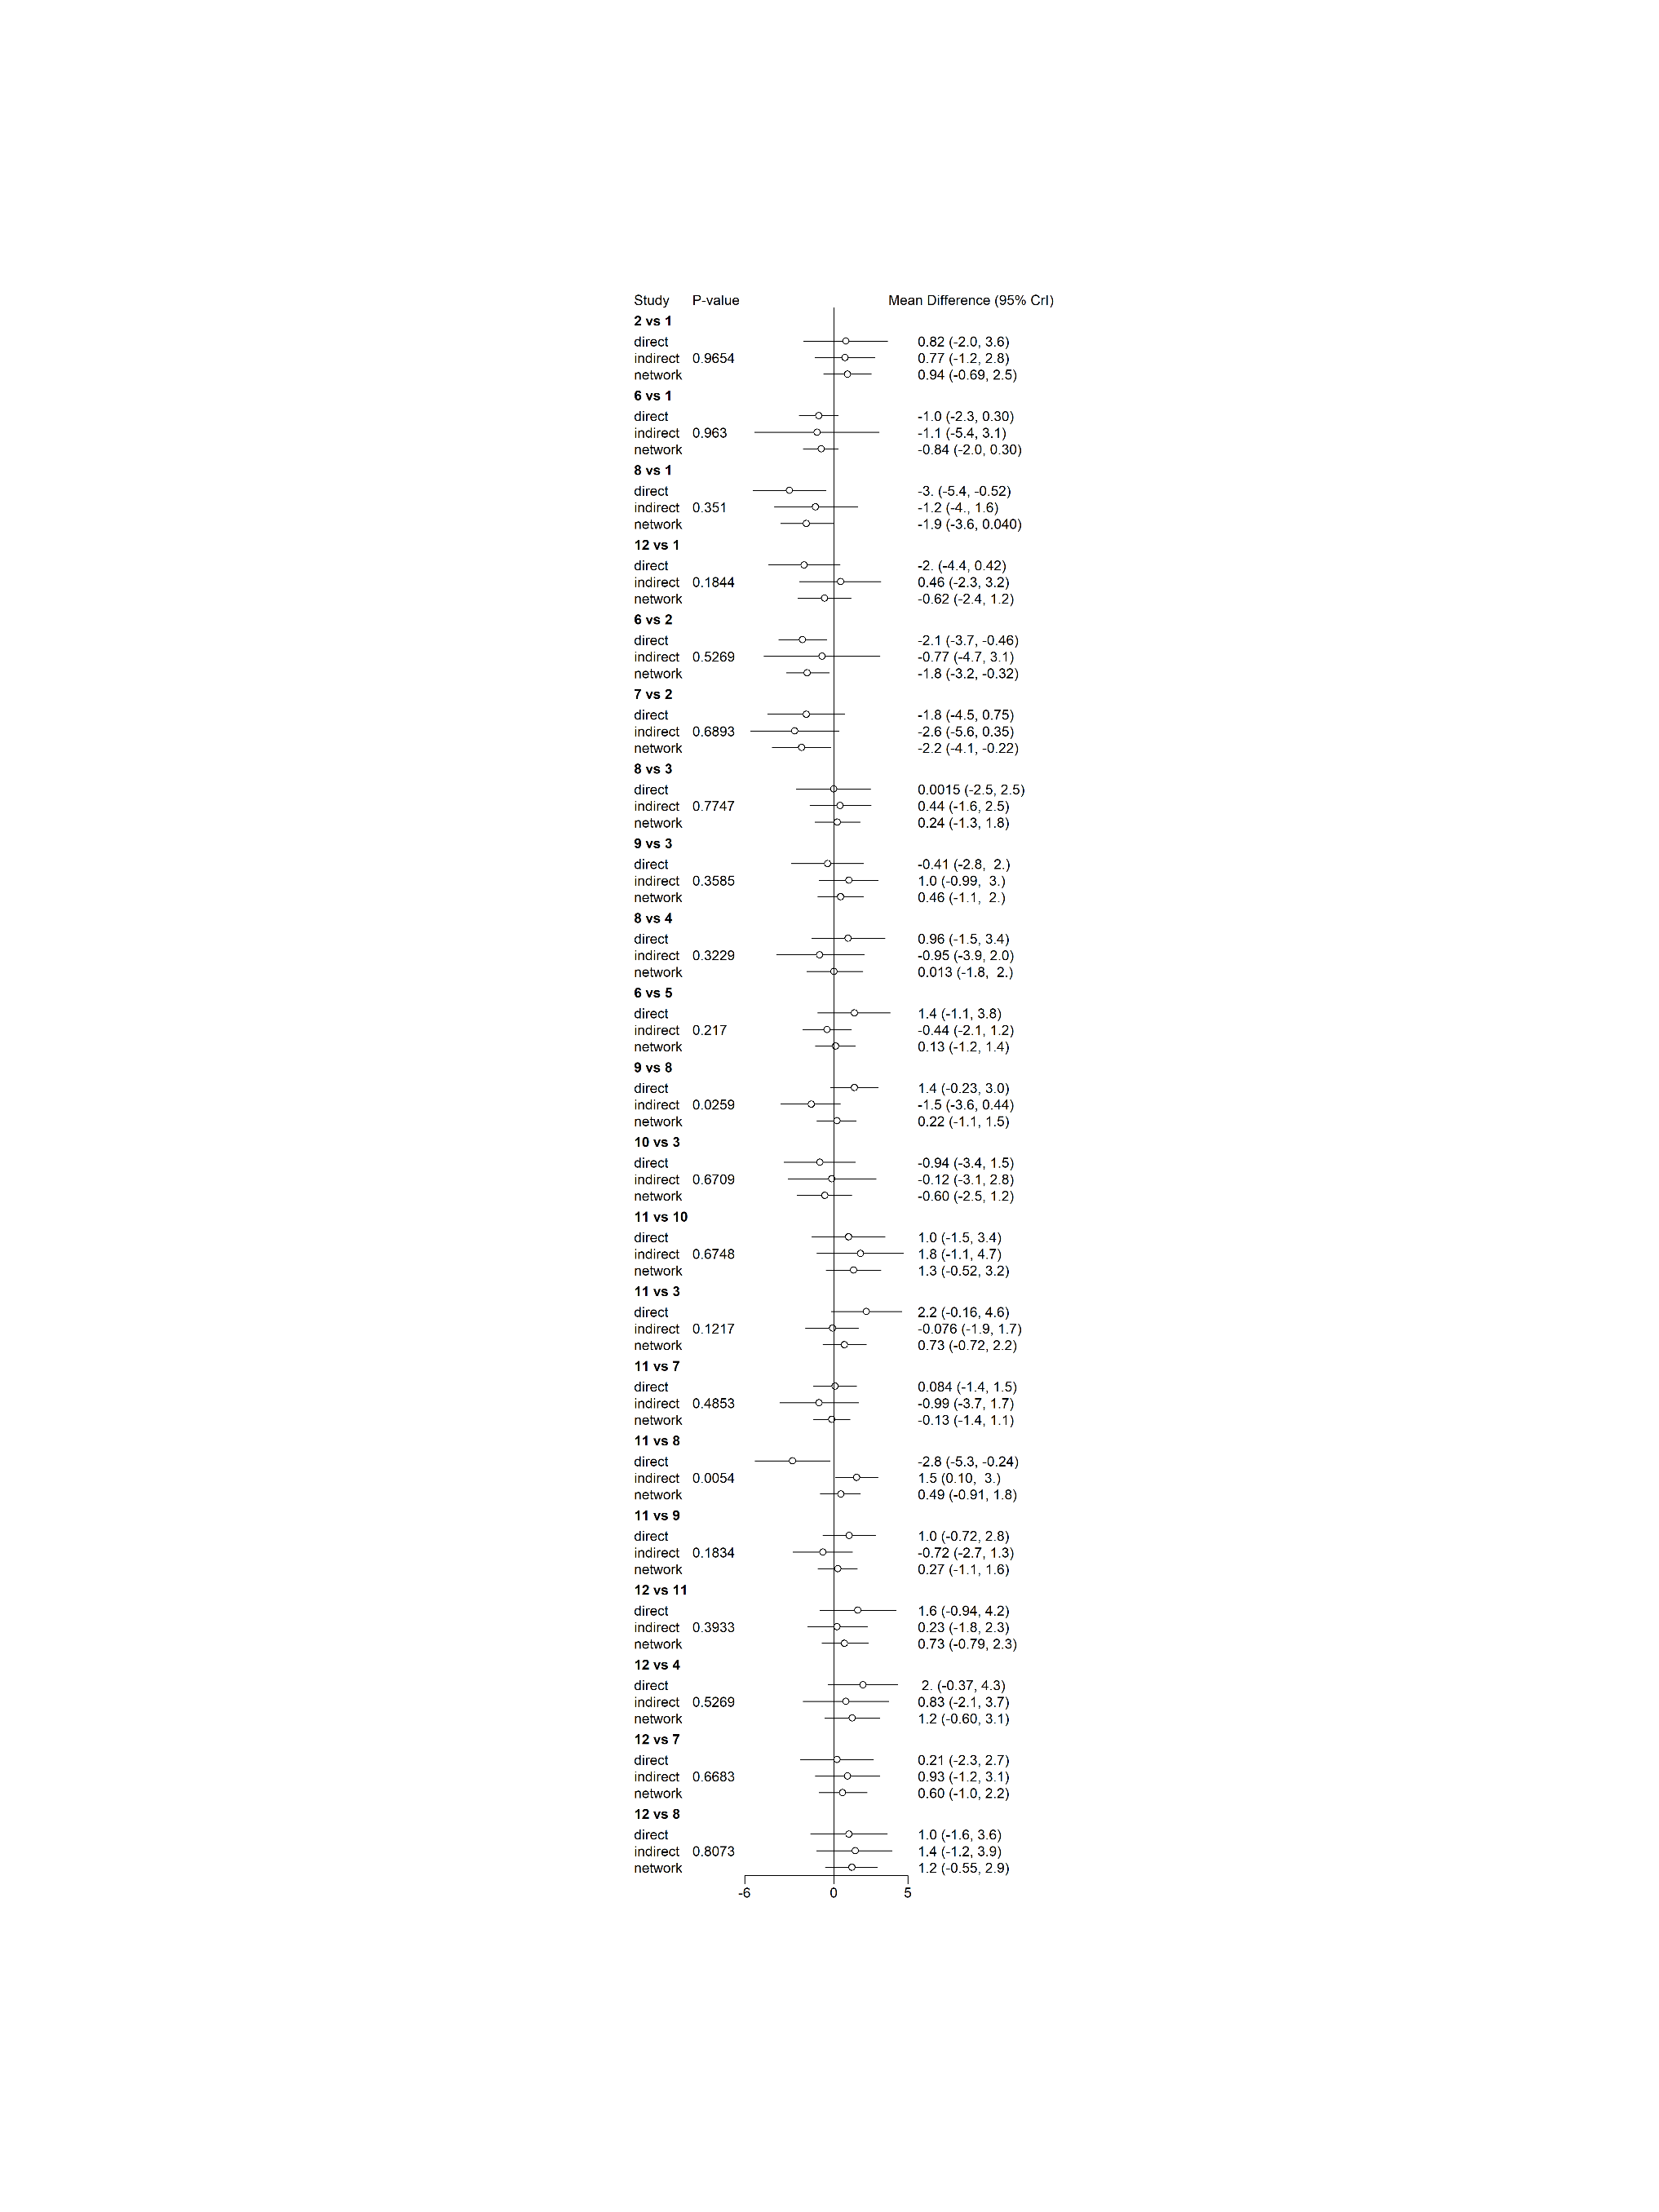


**Fig 2s The inconsistency test chart of all intervention measures. 1, Blank control; 2, Placebo; 3, Propofol; 4, Water perfusion/CO2 insufflation; 5, Distraction; 6, External physical intervention;7, Distraction + Analgesia + Sedation; 8, CO2/Water insufflation + Analgesia + Sedation; 9, Pethidine + Sedation; 10, Physical intervention + Analgesia + Sedation; 11, Fentanyl + Sedation; 12, Agonist-antagonist opioids + Sedation.**


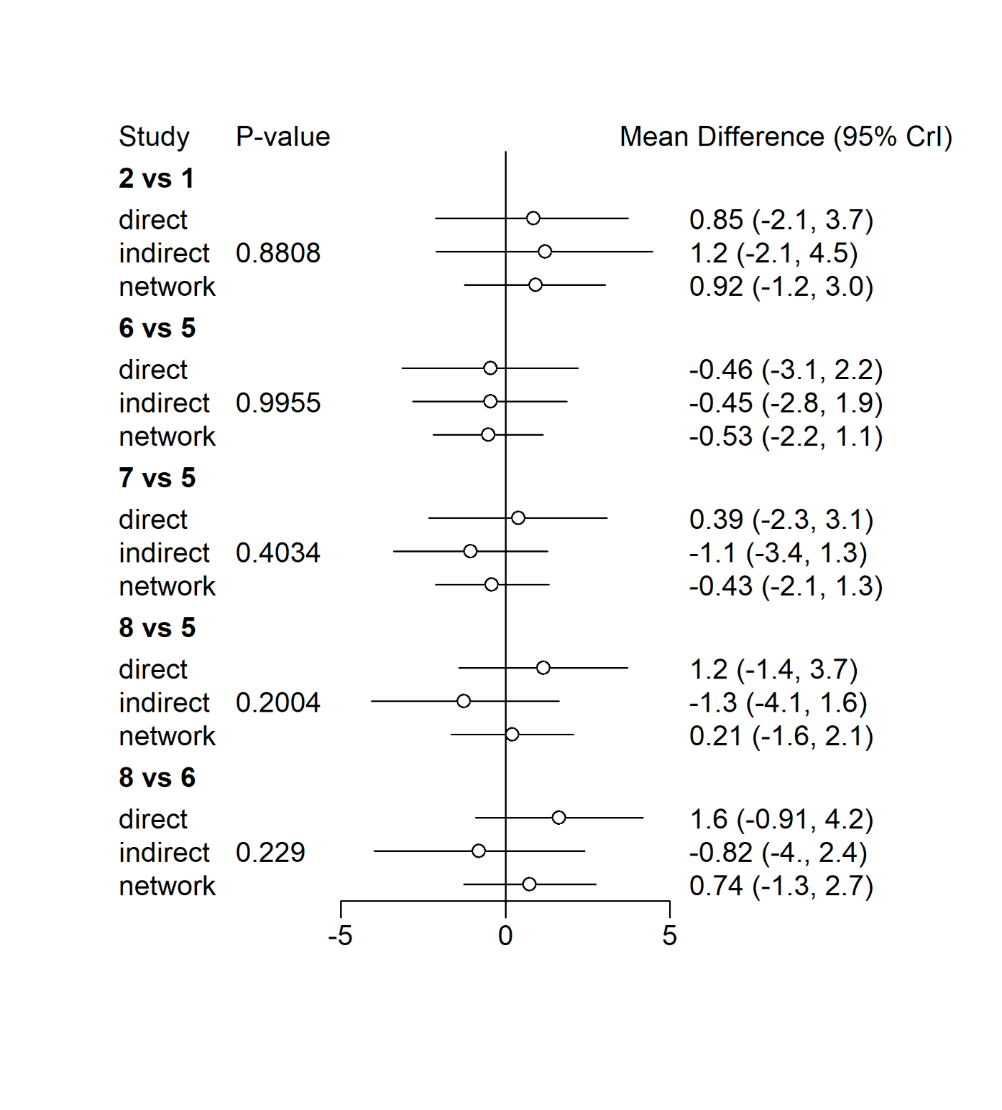


**Fig 3s The inconsistency test chart of non-pharmaceutical intervention measures. 1, Blank Control; 2, Placebo; 3, Water perfusion; 4, CO2 insufflation; 5, VR; 6, Music; 7, Visual distraction; 8, Abdominal compression; 9, Electrical stimulation.**


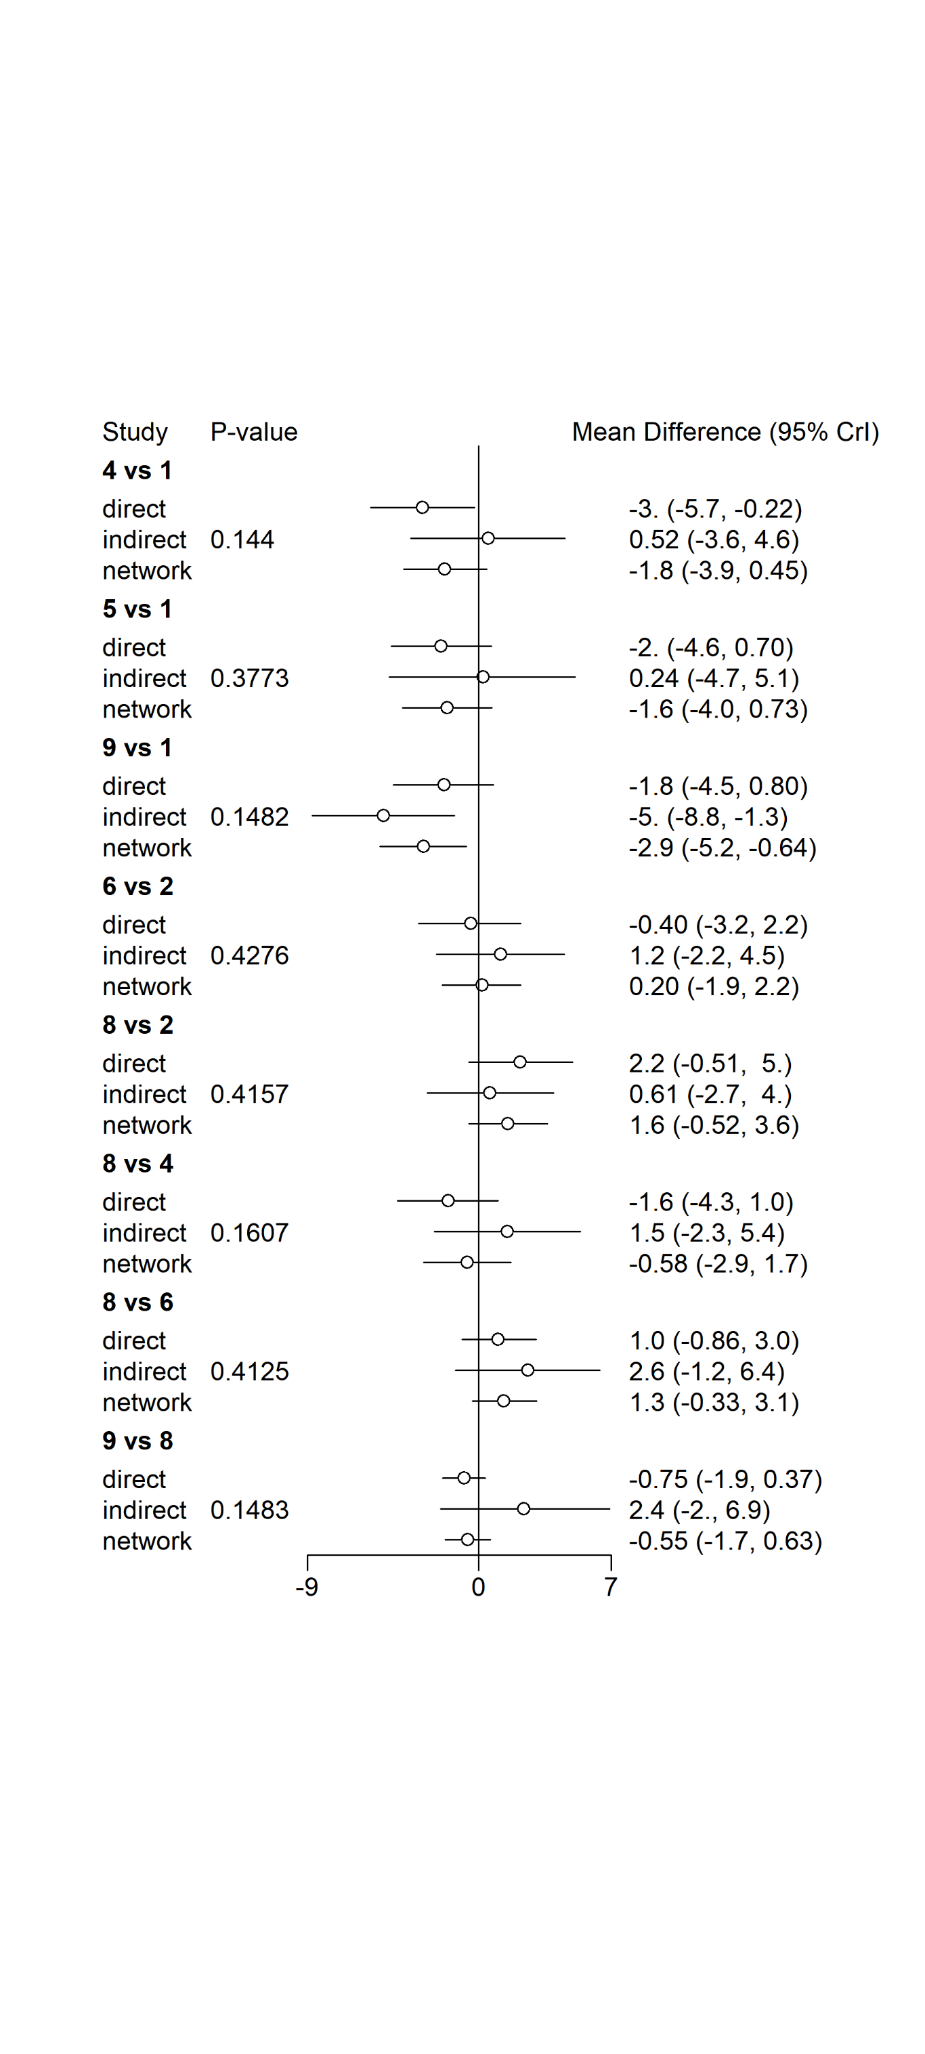


**Fig 4s Inconsistency test chart of drugs and combined intervention measures. 1, Placebo; 2, Propofol; 3, Propofol + Non-pharmacological Interventions; 4, Nalbuphine/Dezocine/Pentazocine + Diazepam/Midazolam; 5, Nalbuphine/Dezocine/Pentazocine + Benzodiazepines + Non-pharmacological Interventions; 6, Pethidine + Benzodiazepines/Propofol; 7, Pethidine + Benzodiazepines + Non-pharmacological Interventions;8, Fentanyl + Midazolam/Propofol; 9, Fentanyl + Midazolam + Non-pharmacological Interventions.**


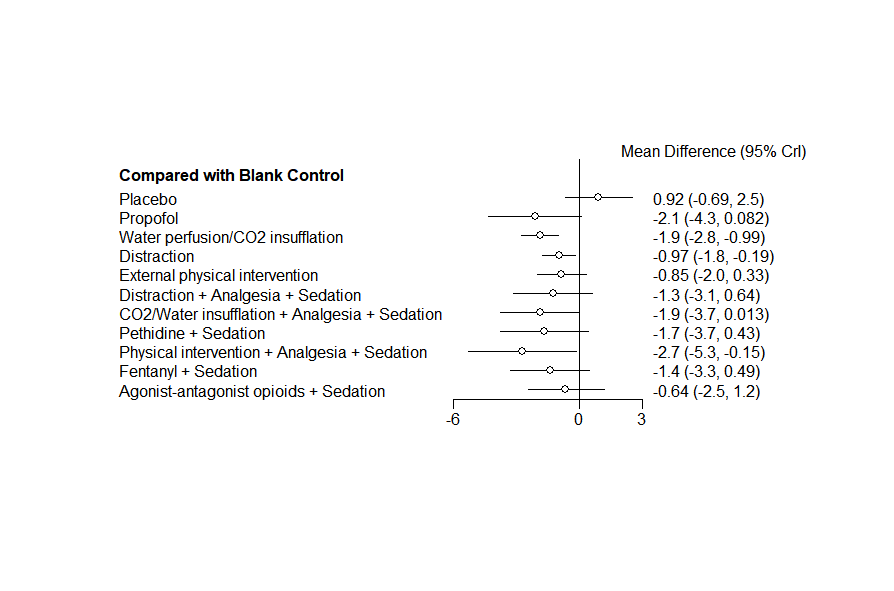


**Fig 5s A mixed comparative forest plot of all intervention measures**


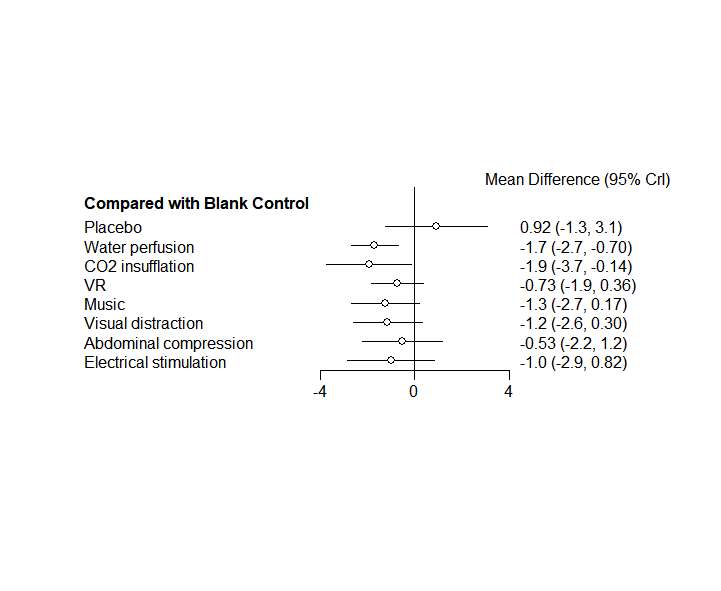


**Fig 6s Mixed comparative forest plots of non-pharmaceutical intervention measures**


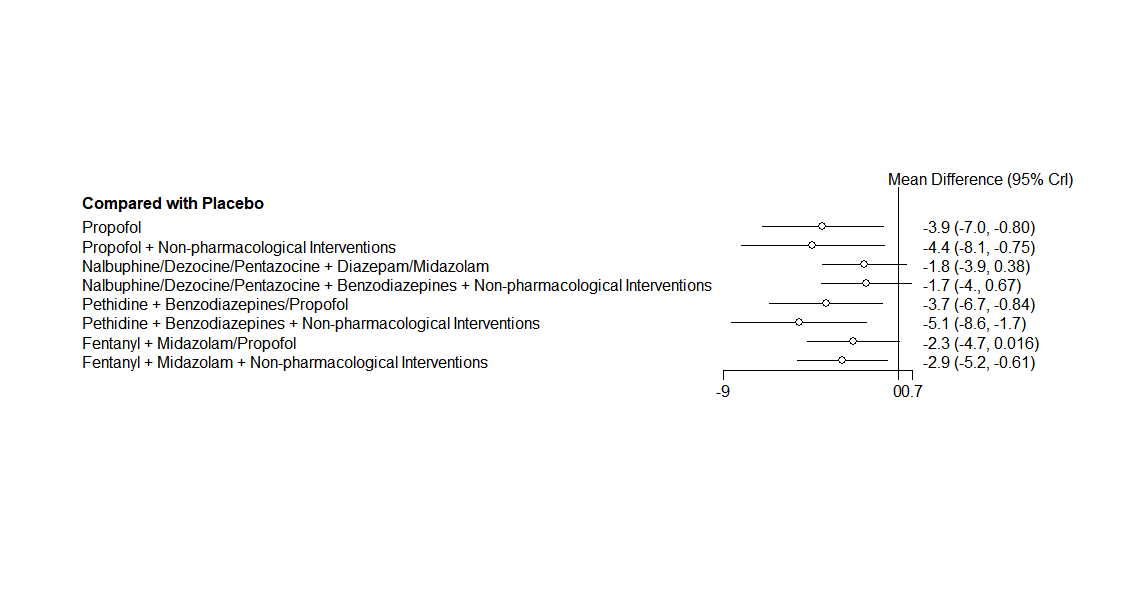


**Fig 7s A mixed comparative forest plot of drugs and mixed intervention measures**


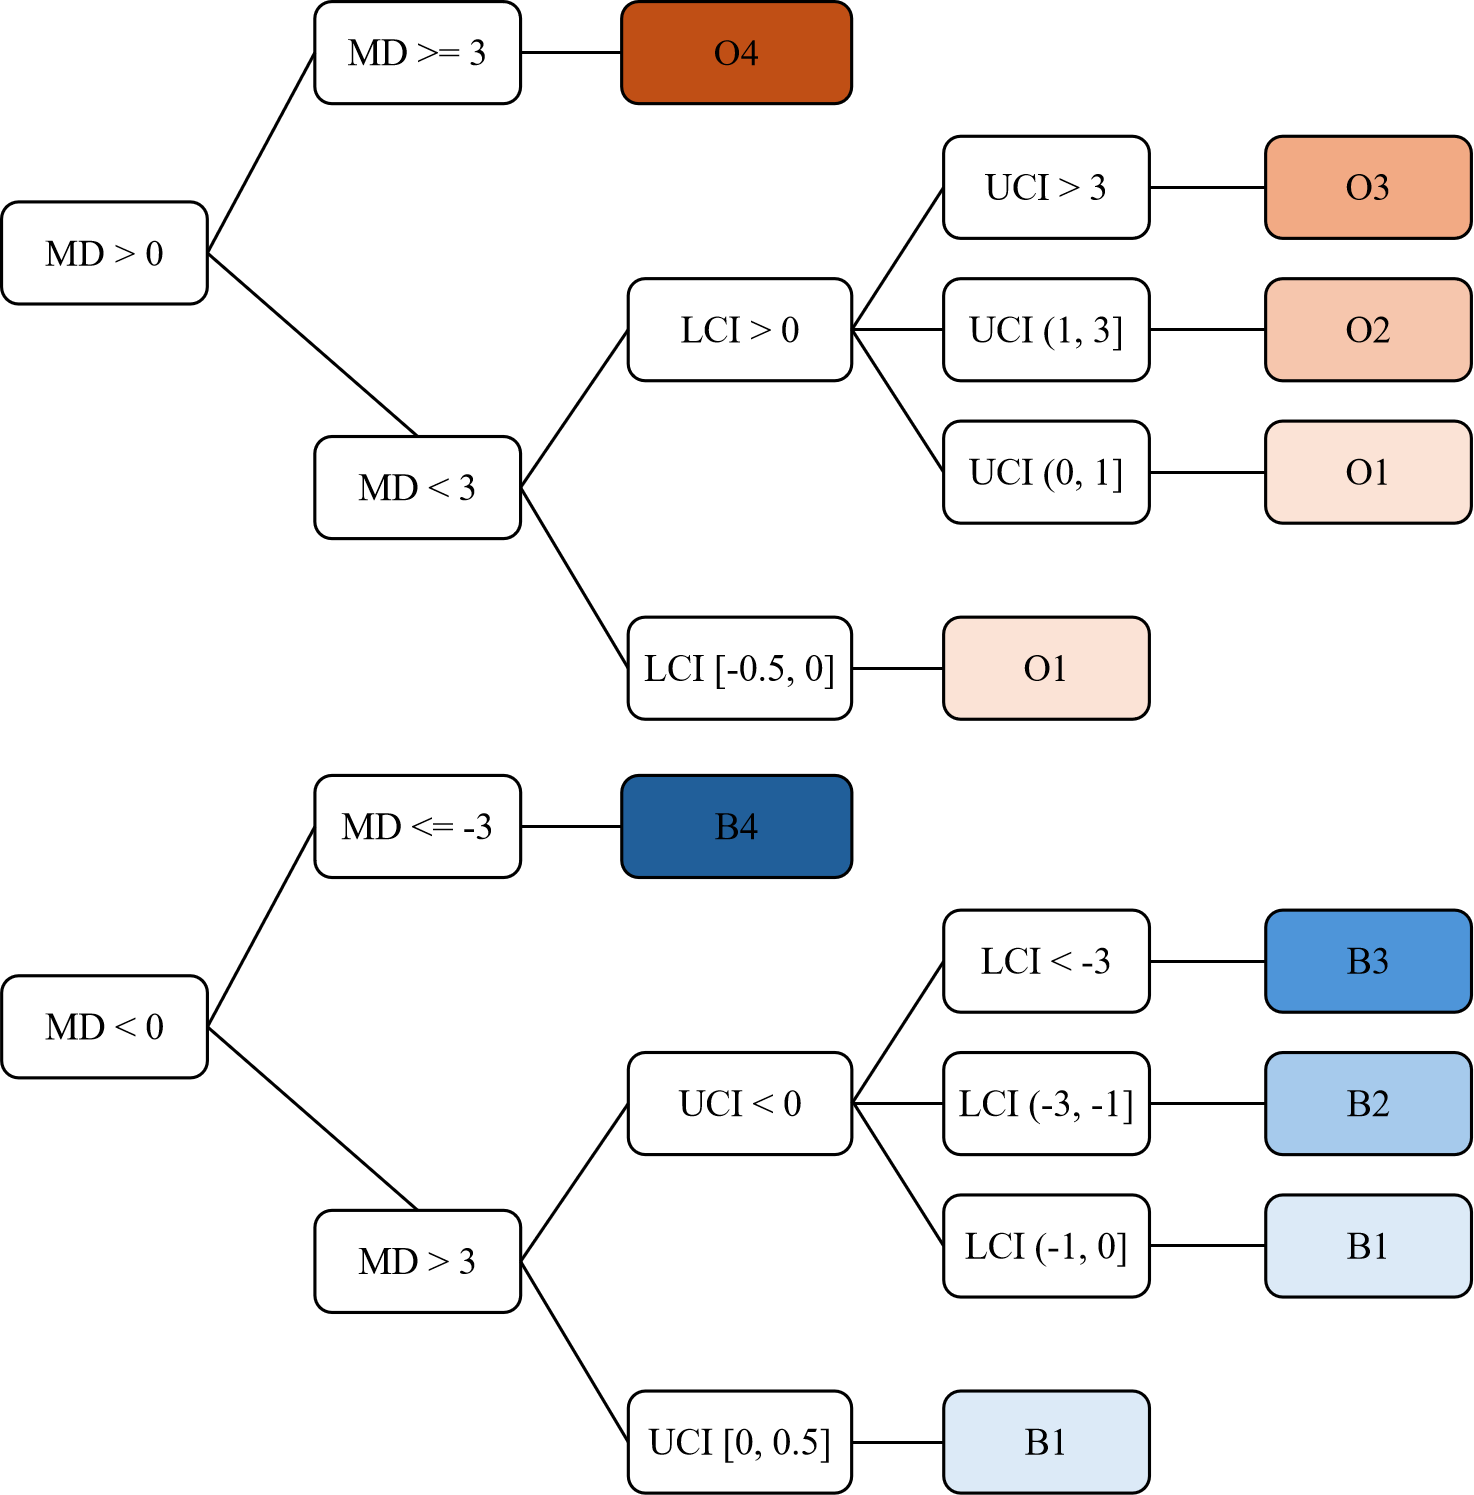


**Fig. 8s Color filling calculation formula; (MD stands for mean difference; UCI stands for upper limit of confidence interval; LCI stands for lower limit of confidence interval)**

**Reference**

1. Ni YF, Lian QQ, Jiang PW, et al. Application of acupuncture analgesia in colonoscopy. *Zhongguo Zhen Jiu* 2008;27(10):766-8.

2. Wong JC, Yau KK, Cheung HY, et al. Towards painless colonoscopy: a randomized controlled trial on carbon dioxide-insufflating colonoscopy. *ANZ J Surg* 2008;78(10):871-4. doi: 10.1111/j.1445-2197.2008.04683.x

3. Leung JW, Mann SK, Siao-Salera R, et al. A randomized, controlled comparison of warm water infusion in lieu of air insufflation versus air insufflation for aiding colonoscopy insertion in sedated patients undergoing colorectal cancer screening and surveillance. *Gastrointest Endosc* 2009;70(3):505-10. doi: 10.1016/j.gie.2008.12.253 [published Online First: 20090624]

4. Hayee BH, Dunn J, Loganayagam A, et al. Midazolam with meperidine or fentanyl for colonoscopy: results of a randomized trial. *Gastrointestinal Endoscopy* 2009;69(3):681-87. doi: 10.1016/j.gie.2008.09.033

5. Hsieh Y-H, Chou A-L, Lai Y-Y, et al. Propofol Alone Versus Propofol in Combination With Meperidine for Sedation During Colonoscopy. *Journal of Clinical Gastroenterology* 2009;43(8):753-57. doi: 10.1097/MCG.0b013e3181862a8c

6. Leung FW, Jackson G, Okamoto KE, et al. A Proof-of-Concept RCT of Water vs. Air Method in Scheduled, Unsedated Colonoscopy in United States Veterans - Final Report Demonstrating Significantly Improved Outcomes in Unsedated Colonoscopy by the Water Method. *Gastroenterology* 2010;138(5):S56-S57.

7. Radaelli F, Paggi S, Amato A, et al. Warm water infusion versus air insufflation for unsedated colonoscopy: a randomized, controlled trial. *Gastrointest Endosc* 2010;72(4):701-9. doi: 10.1016/j.gie.2010.06.025

8. Geyer M, Guller U, Beglinger C. Carbon dioxide insufflation in routine colonoscopy is safe and more comfortable: results of a randomized controlled double-blinded trial. *Diagn Ther Endosc* 2011;2011:378906. doi: 10.1155/2011/378906 [published Online First: 20110615]

9. Amer-Cuenca JJ, Goicoechea C, Girona-López A, et al. Pain relief by applying transcutaneous electrical nerve stimulation (TENS) during unsedated colonoscopy: a randomized double-blind placebo-controlled trial. *Eur J Pain* 2011;15(1):29-35. doi: 10.1016/j.ejpain.2010.05.006 [published Online First: 20100609]

10. Pohl J, Messer I, Behrens A, et al. Water infusion for cecal intubation increases patient tolerance, but does not improve intubation of unsedated colonoscopies. *Clin Gastroenterol Hepatol* 2011;9(12):1039-43.e1. doi: 10.1016/j.cgh.2011.06.031 [published Online First: 20110713]

11. Hsieh Y-H, Lin H-J, Tseng K-C. Limited water infusion decreases pain during minimally sedated colonoscopy. *World Journal of Gastroenterology* 2011;17(17):2236-40. doi: 10.3748/wjg.v17.i17.2236

12. Toros AB, Ersoz F, Ozcan O. Does a fitted abdominal corset makes colonoscopy more tolerable? *Dig Endosc* 2012;24(3):164-7. doi: 10.1111/j.1443-1661.2011.01207.x [published Online First: 20111027]

13. Chen Y, Du B, Yang C, et al. Insufflation of carbon dioxide at colonoscopy elevates degree of comfort in elderly patients: a randomized controlled trial. *Chinese Journal of Gastroenterology* 2012;17(5):288-92. doi: 10.3969/j.issn.1008-7125.2012.05.008

14. Bayupurnama P, Ratnasari N, Indrarti F, et al. The Water-Aided Method in Routine Unsedated Colonoscopy: A Randomized Controlled Trial (RCT) in Diagnostic Cases in Indonesian Patients Presidential Poster. *American Journal of Gastroenterology* 2012;107:S733-S34. doi: 10.14309/00000434-201210001-01802

15. Szura M, Pach R, Matyja A, et al. Carbon dioxide insufflation during screening unsedated colonoscopy: a randomised clinical trial. *Eur J Cancer Prev* 2015;24(1):37-43. doi: 10.1097/cej.0000000000000047

16. Umezawa S, Higurashi T, Uchiyama S, et al. Visual distraction alone for the improvement of colonoscopy-related pain and satisfaction. *World J Gastroenterol* 2015;21(15):4707-14. doi: 10.3748/wjg.v21.i15.4707

17. Chen Y, Wu W, Yao Y, et al. Transcutaneous electric acupoint stimulation at Jiaji points reduce abdominal pain after colonoscopy: a randomized controlled trial. *International Journal of Clinical and Experimental Medicine* 2015;8(4):5972-77.

18. Jiang X, Li X, Zhou Hui L. Effects of Visual and Audiovisual Distraction on Pain and Anxiety Among Patients Undergoing Colonoscopy. *Gastroenterology Nursing* 2015;38(1):55-61. doi: 10.1097/sga.0000000000000089

19. Schroeder C, Kaoutzanis C, Tocco-Bradley R, et al. Patients Prefer Propofol to Midazolam Plus Fentanyl for Sedation for Colonoscopy: Results of a Single-Center Randomized Equivalence Trial. *Dis Colon Rectum* 2016;59(1):62-69. doi: 10.1097/dcr.0000000000000512

20. De Silva AP, Niriella MA, Nandamuni Y, et al. Effect of audio and visual distraction on patients undergoing colonoscopy: a randomized controlled study. *Endoscopy international open* 2016;4(11):E1211-E14.

21. Ko SY. The Effectiveness of Music Interventions on Anxiety Level, Pain Level and Satisfaction for Chinese Adult Patients Undergoing Colonoscopy2016.

22. Cao Y, Wang P. Impact of water infusion colonoscopy on abdominal pain and inflammatory response in elderly patients. *Chinese Journal of Gastroenterology* 2017;22(1):40-42. doi: 10.3969/j.issn.1008-7125.2017.01.009

23. Azevedo R, Leitão C, Pinto J, et al. Can Water Exchange Improve Patient Tolerance in Unsedated Colonoscopy A Prospective Comparative Study. *GE Port J Gastroenterol* 2018;25(4):166-74. doi: 10.1159/000484093 [published Online First: 20171116]

24. Adigun TA, Akere A, Ayandipo OO, et al. A comparison of propofol - fentanyl with midazolam - pentazocine combination for sedation and analgesia during colonoscopy in Ibadan Nigeria. *Journal of Clinical Sciences* 2019;16(1):1-6. doi: 10.4103/jcls.jcls_38_18

25. Pontone S, Palma R, Donato G, et al. Efficacy of Sedation by Midazolam in Association With Meperidine or Fentanyl and Role of Patient Distress During Elective Colonoscopy. *Gastroenterol Nurs* 2020;43(3):258-63. doi: 10.1097/sga.0000000000000456

26. Veldhuijzen G, Klaassen NJM, Van Wezel RJA, et al. Virtual reality distraction for patients to relieve pain and discomfort during colonoscopy. *Endosc Int Open* 2020;8(7):E959-e66. doi: 10.1055/a-1178-9289 [published Online First: 20200630]

27. Hsieh Y-H, Tseng C-W, Koo M, et al. Feasibility of sedation on demand in Taiwan using water exchange and air insufflation: A randomized controlled trial. *Journal of Gastroenterology and Hepatology* 2020;35(2):256-62. doi: 10.1111/jgh.14839

28. Joan Gan CY, Chan KK, Tan JH, et al. Smartphone-controlled patch electro-acupuncture versus conventional pain relief during colonoscopy: a randomized controlled trial. *ANZ J Surg* 2021;91(6):E375-e81. doi: 10.1111/ans.16870 [published Online First: 20210419]

29. Cakir SK, Evirgen S. The Effect of Virtual Reality on Pain and Anxiety During Colonoscopy: A Randomized Controlled Trial. *Turkish Journal of Gastroenterology* 2021;32(5):451-57. doi: 10.5152/tjg.2021.191081

30. Han C, Xu T, Sheng L, et al. Improving the discomfort and satisfaction of colonoscopy by distraction with smartphones A prospective randomized controlled study. *Medicine* 2021;100(9) doi: 10.1097/md.0000000000023799

31. Brix LD, Pedersen ASB. Effect of music intervention in colonoscopy-naïve adults: a randomised controlled trial. *Br J Nurs* 2022;31(10):526-32. doi: 10.12968/bjon.2022.31.10.526

32. Liu Q, Zang Y, Zang W, et al. Implementation of virtual reality technology to decrease patients' pain and nervousness during colonoscopies: a prospective randomised controlled single-blinded trial. *Clinical Medicine* 2022;22(3):237-40. doi: 10.7861/clinmed.2022-0001

33. Sun D-J, You Y-X, He X-J, et al. Effects of light music played by piano intervention on satisfaction, anxiety, and pain in patients undergoing colonoscopy: A randomized controlled trial. *Medicine* 2022;101(52) doi: 10.1097/md.0000000000032339

34. Tani A, Tartarisco G, Vagheggini G, et al. Binaural beats reduce feeling of pain and discomfort during colonoscopy procedure in not-sedated patients: A randomized control trial

*Complementary Therapies in Clinical Practice* 2022;48 doi: 10.1016/j.ctcp.2022.101605

35. He T, Liu C, Lu Z-X, et al. Effect of wrist-ankle acupuncture on propofol dosage during painless colonoscopy: A randomized controlled prospective study. *World Journal of Clinical Cases* 2022;10(12):3764-72. doi: 10.12998/wjcc.v10.i12.3764

36. Cakir SK, Evirgen S. Three Distraction Methods for Pain Reduction During Colonoscopy: A Randomized Controlled Trial Evaluating the Effects on Pain and Anxiety. *J Perianesth Nurs* 2023;38(5):e1-e7. doi: 10.1016/j.jopan.2023.02.007 [published Online First: 20230810]

37. Huang X, Wang H, Shi L, et al. Effect of transcutaneous electrical nerve stimulation based on wrist-ankle acupuncture theory for pain relief during colonoscopy without anesthesia: a randomized controlled trial. *Endoscopy* 2024 doi: 10.1055/a-2373-0513 [published Online First: 20240916]

38. Shamali M, Vilmann P, Johansen NR, et al. Virtual reality intervention to improve quality of care during colonoscopy: a hybrid type 1 randomized controlled trial. *Gastrointest Endosc* 2024 doi: 10.1016/j.gie.2024.05.023 [published Online First: 20240606]

39. Hirani AAA, Ismail FW, Abdulaziz F, et al. The Effects of Music Therapy on Patients Undergoing Colonoscopy in a Tertiary Care Hospital at Karachi, Pakistan: A Comparative Study. *J Pain Palliat Care Pharmacother* 2024:1-11. doi: 10.1080/15360288.2024.2357551 [published Online First: 20240603]

40. Veisman I, Duchan MT, Lahat A, et al. Unsedated colonoscopy utilizing virtual reality distraction: a pilot-controlled study. *Surgical Endoscopy and Other Interventional Techniques* 2024;38(9):5060-67. doi: 10.1007/s00464-024-10999-1
